# Supplementary material
Source: Springer Nature journal article supplement (https://www.springermedizin.de/resource/supplementary/12888_2011_1109_MOESM1_ESM.pdf/9479080)
Supplement: MOESM1 [file 9479080]

Consecutively admitted users of inpatient mental health care (2010-04 - 2012-04), compulsory admission during past 24 months

Informed consent, randomisation

Intervention group

n=200

Control group

n=200

$t_0$

Baseline assessment

*Crisis card, check list*

*Monitoring*

$t_1$

1 year followup

*Monitoring*

$t_2$

2 year followup
